# Supplementary material
Source: PubMed Central journal article supplement (PMC6793936)
Supplement: NIHMS1532653-supplement-2.pdf [file NIHMS1532653-supplement-2.pdf]

**A**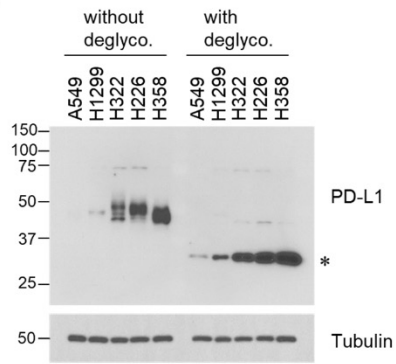**D**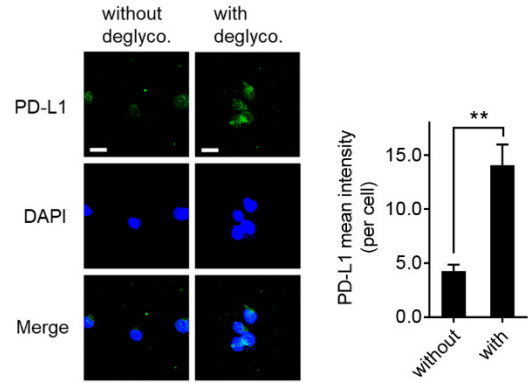**B**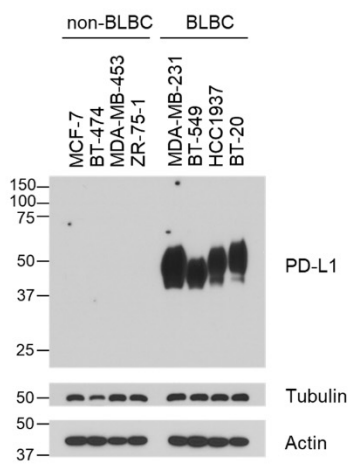**E**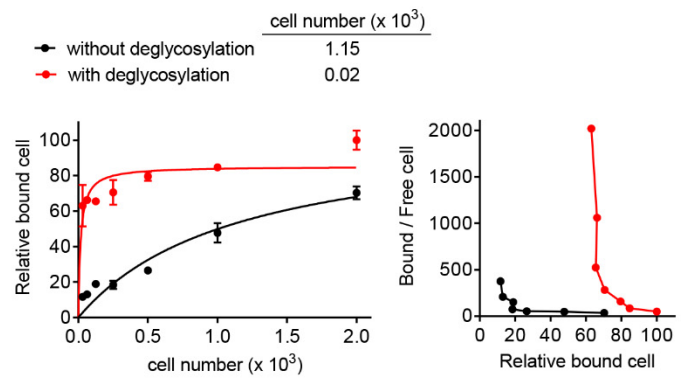**C**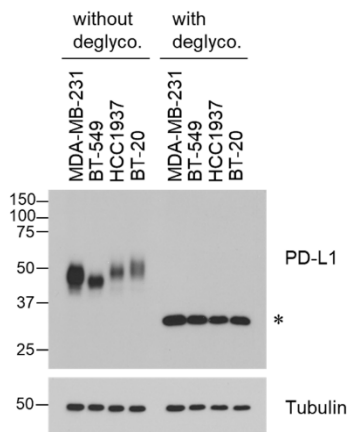**F**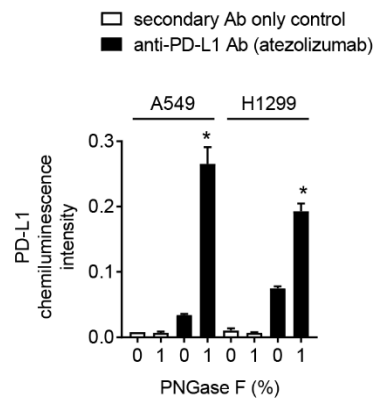

**Figure S1. Anti-PD-L1 signal is enhanced after deglycosylation in human cancer cells in immunofluorescence and ELISA-based assays.** Related to Figure 1.

(A) Cell lysates of lung cancer cells processed with or without deglycosylation (deglyco.) by PNGase F (5%) pretreatment and immunoblotting (IB) with the indicated antibodies. Anti-PD-L1 antibody for IB, Cell Signaling (13684). Asterisk indicates non-glycosylated PD-L1.

(B) IB of basal-like breast cancer (BLBC) and non-BLBC cells with the indicated antibodies.

(C) Cell lysates of BLBC cells processed with or without deglycosylation by PNGase F (5%) pretreatment and IB with the indicated antibodies.

(D) Immunofluorescence confocal microscopy of H1299 cells processed with or without deglycosylation by PNGase F (5%) pretreatment stained with DAPI and an anti-PD-L1 antibody (Abcam, ab58810). Bar, 10  $\mu$ m. Quantification is shown to the right. Data are representative of 3 independent experiments, randomly chosen in 3 different fields.

(E) Left: saturation binding assay of H1299 cell lysates binding to anti-PD-L1 clone 28-8 mAb. Right: scatchard plot of cell number binding to anti-PD-L1 antibody transformed from the left.

(F) ELISA of PD-L1 level by an anti-PD-L1 Ab atezolizumab (MDACC) in A549 and H1299 cells processed with deglycosylation by PNGase F (1%) pretreatment for comparison with cells without deglycosylation (0%). Negative control, secondary Ab only control.

(D–F) Results are presented as mean  $\pm$  SD. \* $p < 0.05$ , \*\* $p < 0.01$ , Student's t test.

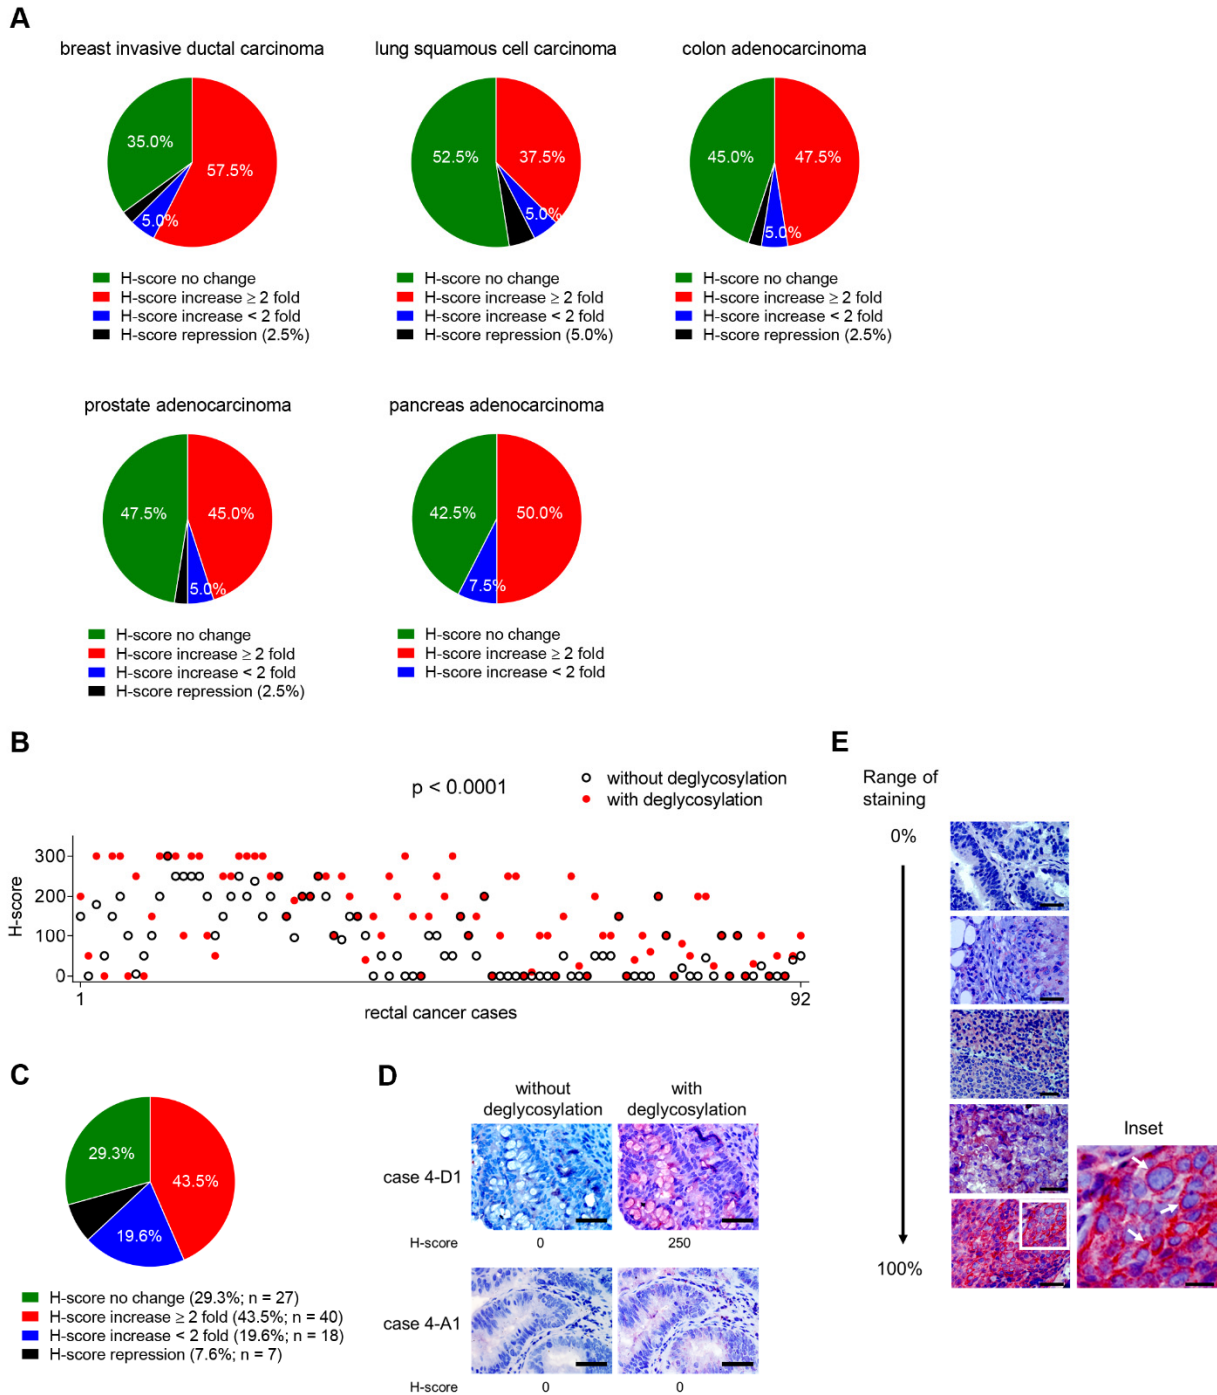

**Figure S2. Anti-PD-L1 signal is enhanced after deglycosylation in a major population of patient samples in different cancer types. Related to Figure 2.**

(A) Individual analysis of five cohorts in multi-organ carcinoma TMA from Figure 2A, containing 40 cases each of breast invasive ductal carcinoma, lung squamous cell carcinoma, colon adenocarcinoma, prostate adenocarcinoma, and pancreas adenocarcinoma.

(B) H-score values representing PD-L1 protein expression from IHC staining of a human rectal cancer TMA (n = 92) processed with or without deglycosylation by PNGase F (5%) pretreatment. Results were analyzed by the Wilcoxon signed-rank test.

(C) A pie chart highlighting the fold change of H-score after N-linked glycosylation removal through PNGase F treatment from (B).

(D) Two representative cases of IHC staining from (B). Bar, 50  $\mu\text{m}$ .

(E) Representative images of PD-L1 IHC staining in the lung cancer tumor microarray (Biomax, #NSC151). Samples displayed varying percentages of the stained cells spanning a wide range from negative (0%) to strongly positive (100%) staining of the tumor cells. Bar, 50  $\mu\text{m}$ . Inset: PD-L1 membrane staining (arrows); bar, 20  $\mu\text{m}$ .

**A**

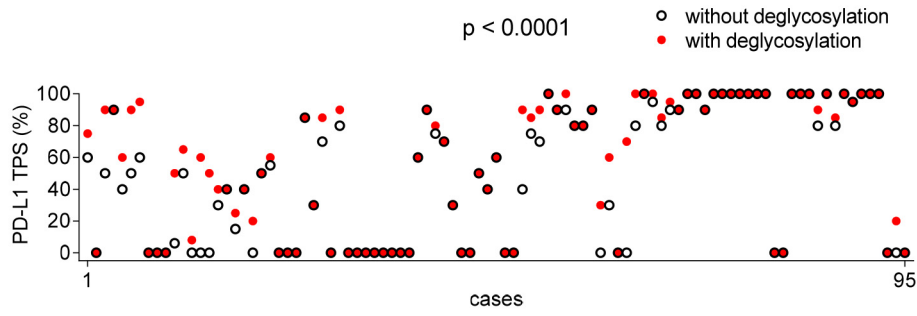

**B**

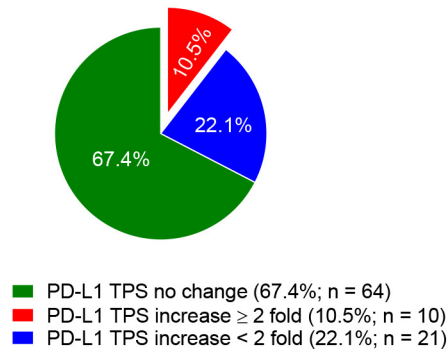

**C**

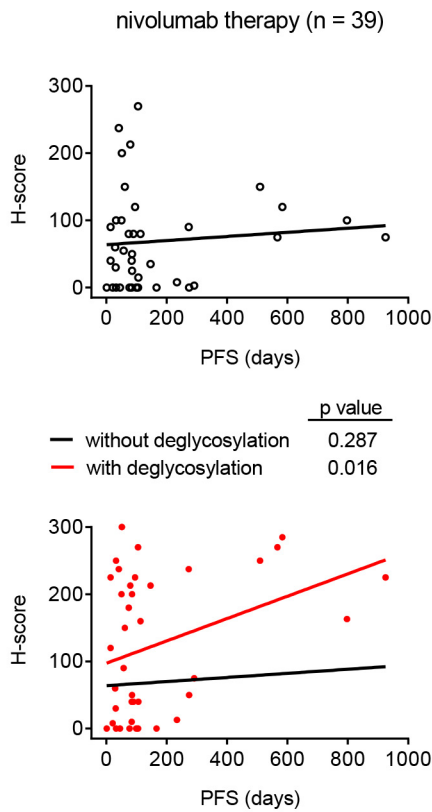

**D**

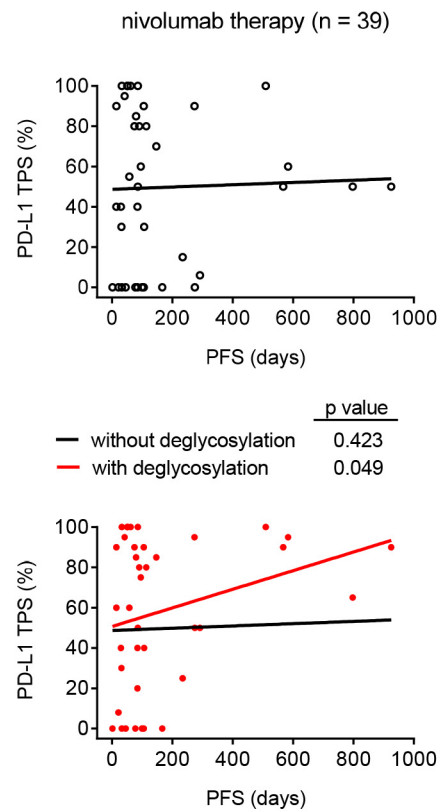

**E**

anti-PD-1 therapies (n = 75)

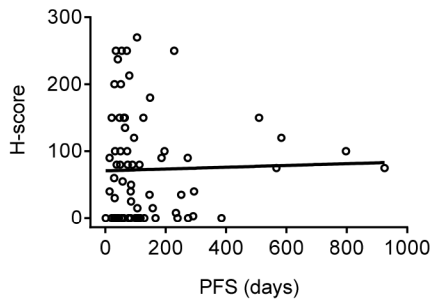

|                           | <u>p value</u> |
|---------------------------|----------------|
| — without deglycosylation | 0.404          |
| — with deglycosylation    | 0.041          |

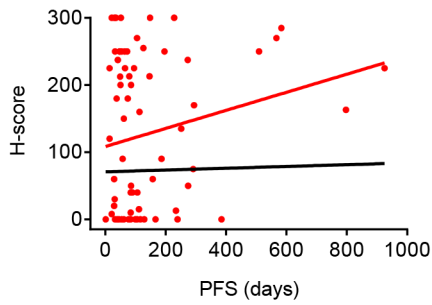**F**

anti-PD-1 therapies (n = 75)

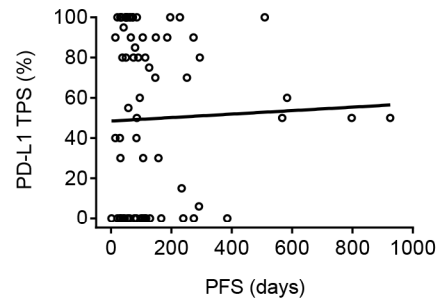

|                           | <u>p value</u> |
|---------------------------|----------------|
| — without deglycosylation | 0.383          |
| — with deglycosylation    | 0.049          |

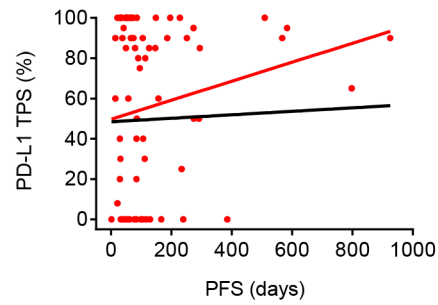**G**

anti-PD-L1 therapies (n = 12)

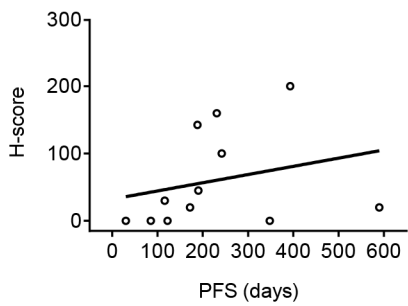

|                           | <u>p value</u> |
|---------------------------|----------------|
| — without deglycosylation | 0.205          |
| — with deglycosylation    | 0.038          |

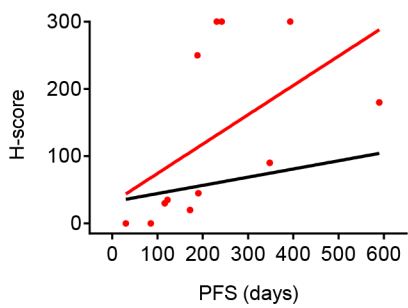**H**

anti-PD-L1 therapies (n = 12)

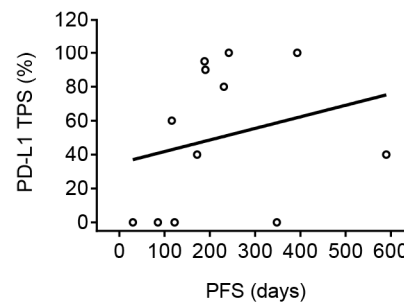

|                           | <u>p value</u> |
|---------------------------|----------------|
| — without deglycosylation | 0.218          |
| — with deglycosylation    | 0.026          |

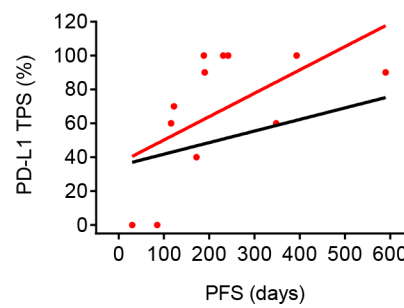

**Figure S3. Deglycosylation improves PD-L1 detection in clinical samples and correlation with patient responses to anti-PD-1/PL1 therapy.** Related to Figure 3.

(A) The percentage of PD-L1 positive signals in tumor cells (TPS; tumor proportion score; % positive cells) from IHC staining of patient tissue slides processed with or without deglycosylation from Figure 3A (n = 95). Results were analyzed by the Wilcoxon signed-rank test.

(B) A pie chart highlighting the fold change in PD-L1 TPS after N-linked glycosylation removal through PNGase F treatment from (A).

(C and D) Correlation between PD-L1 H-score (C) or PD-L1 TPS (D) in patient tissue slides processed with or without deglycosylation and the corresponding progression-free survival (PFS) from nivolumab therapy (n = 39) from Figure 3A.

(E and F) Correlation between PD-L1 H-score (E) or PD-L1 TPS (F) in patient tissue slides processed with or without deglycosylation and the corresponding PFS from anti-PD-1 therapy (nivolumab, pembrolizumab, and camrelizumab; n = 75) from Figure 3A.

(G and H) Correlation between PD-L1 H-score (G) or PD-L1 TPS (H) in patient tissue slides processed with or without deglycosylation and the corresponding PFS from anti-PD-L1 therapy (atezolizumab and durvalumab; n = 12) from Figure 3A.

(C–H) One-tailed p values are shown, Pearson correlation test.

**A**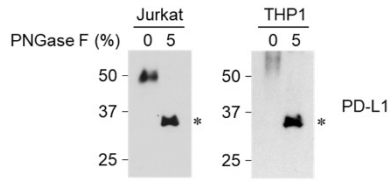**B**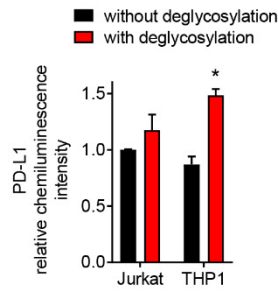**C**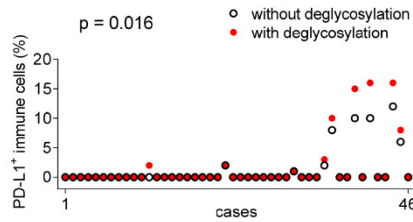**D**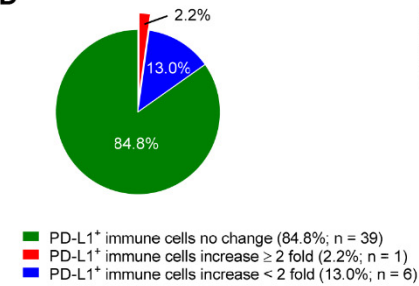**E**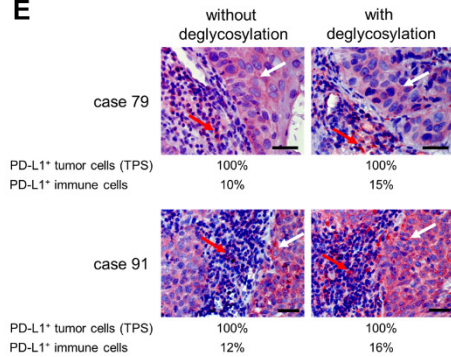**F**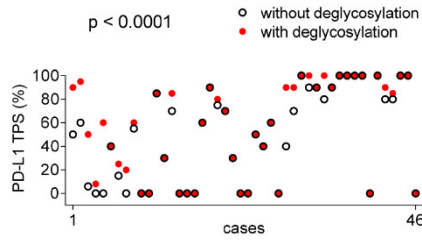**G**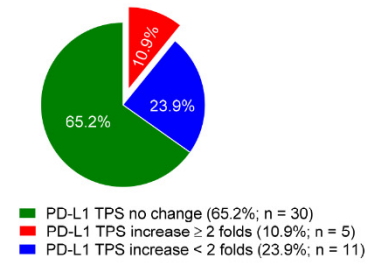**I**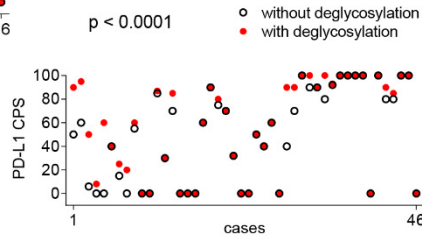**J**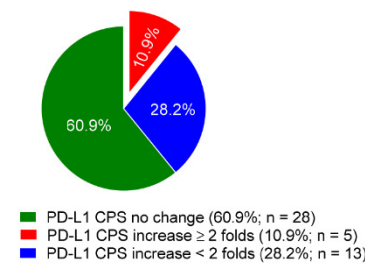**H**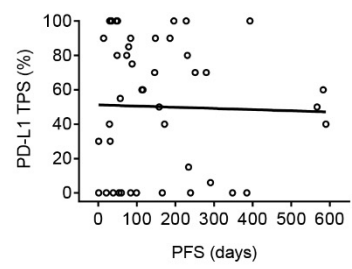**K**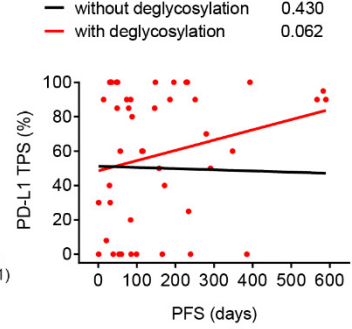**L**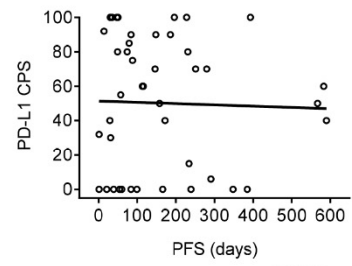**M**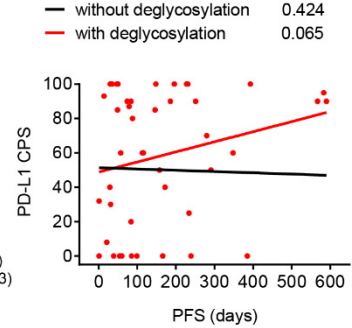



**Figure S4. Sample deglycosylation enhances PD-L1 detection in a small fraction of tumor-associated lymphocytes.** Related to Figure 3.

(A) Cell lysates of human immune cells, including Jurkat (T lymphocytes) and THP1 (monocytes), processed with deglycosylation by PNGase F (5%) pretreatment for comparison with cell lysates without deglycosylation (0%) and IB with anti-PD-L1 Ab (Cell Signaling, 13684). Asterisk indicates non-glycosylated PD-L1.

(B) ELISA of PD-L1 levels (clone 28-8 mAb) in Jurkat and THP1 cells processed with or without deglycosylation by PNGase F (1%) pretreatment. Results are presented as mean  $\pm$  SD. \* $p < 0.05$ , Student's t test.

(C) The percentage of PD-L1 positive signals in immune cells (% PD-L1<sup>+</sup> immune cells) from IHC staining of patient tissue slides processed with or without deglycosylation from Figure 3A (n = 46 containing tumor-associated immune cells). Results were analyzed by the Wilcoxon signed-rank test.

(D) A pie chart highlighting the fold change in the percentage of PD-L1<sup>+</sup> immune cells after N-linked glycosylation removal through PNGase F treatment from (C).

(E) Two representative cases of IHC staining from (C). PD-L1<sup>+</sup> tumor cells (TPS), white arrows; PD-L1<sup>+</sup> immune cells, red arrows. Bar, 50  $\mu$ m.

(F) The percentage of PD-L1 TPS from IHC staining of patient tissue slides processed with or without deglycosylation from (C). Results were analyzed by the Wilcoxon signed-rank test.

(G) A pie chart highlighting the fold change in PD-L1 TPS after N-linked glycosylation removal through PNGase F treatment from (F).

(H) Correlation between PD-L1 TPS in patient tissue slides processed with or without deglycosylation and the corresponding PFS from anti-PD-1/PD-L1 therapy from (F). Pearson correction test; one-tailed.

(I) PD-L1 positive signals in both tumor and immune cells (CPS; combined positive score) from IHC staining of patient tissue slides processed with or without deglycosylation from (C). Results were analyzed by the Wilcoxon signed-rank test.

(J) A pie chart highlighting the fold change in PD-L1 CPS after N-linked glycosylation removal through PNGase F treatment from (I).

(K) Correlation between PD-L1 CPS in patient tissue slides processed with or without deglycosylation and the corresponding PFS from anti-PD-1/PD-L1 therapy from (I). Pearson correction test; one-tailed.

**A**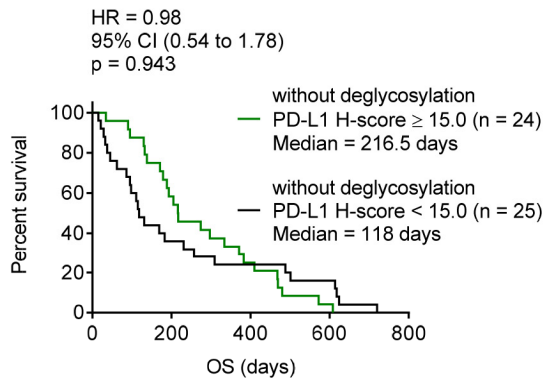**E**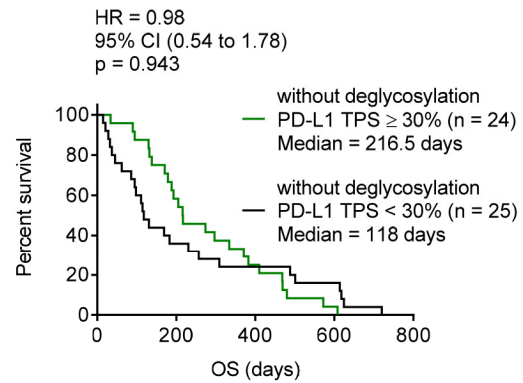**B**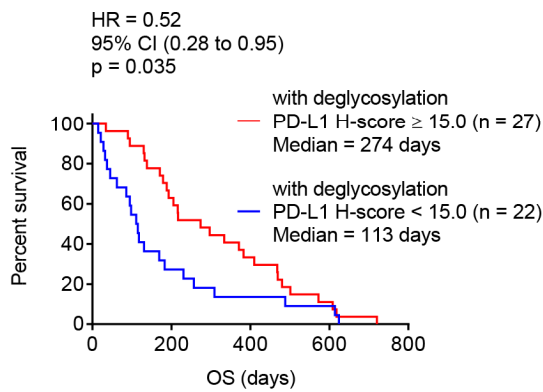**F**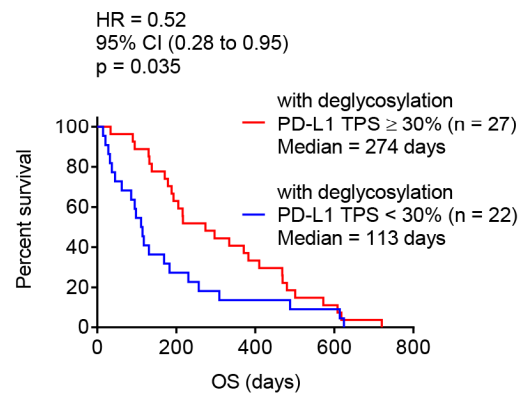**C**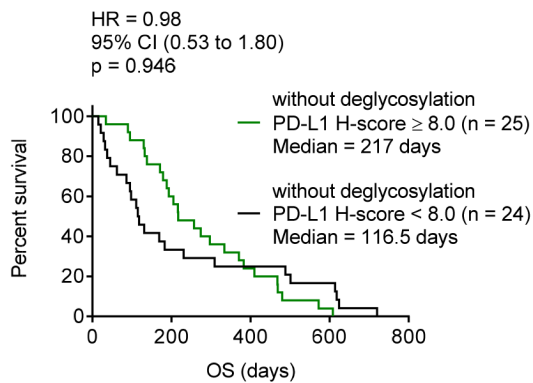**G**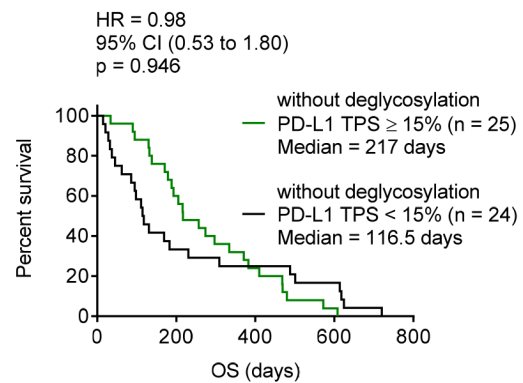**D**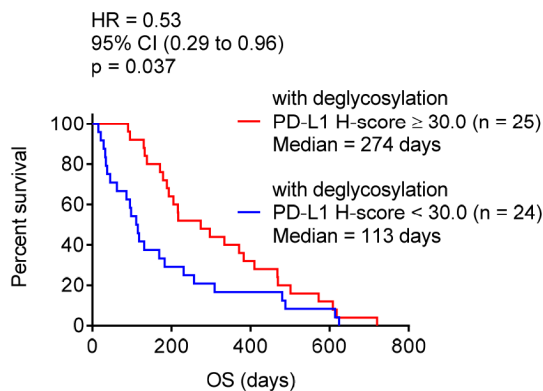**H**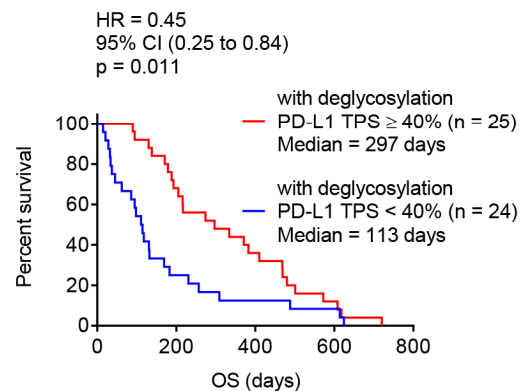

**Figure S5. Antigen retrieval by protein deglycosylation improves the utility of PD-L1 as a predictive biomarker for immunotherapy.** Related to Figure 5.

(A and B) The overall survival (OS) of cancer patient samples processed without (A) or with (B) deglycosylation by PNGase F (5%) pretreatment. Cases with H-score equal to or higher than the median value of total 49 cases (H-score = 15.0) were considered as high expression and those with H-score less than the median value as low expression.

(C and D) The OS of cancer patient samples processed without (C) or with (D) deglycosylation by PNGase F (5%) pretreatment. Cases with H-score equal to or higher than the median value of individual group [H-score = 8.0 in the group of without glycosylation (C) and H-score = 30.0 in the group of with glycosylation (D), respectively] were considered as high expression and those with H-score less than the respective median value as low expression.

(E and F) The OS of cancer patient samples processed without (E) or with (F) deglycosylation by PNGase F (5%) pretreatment. Cases with PD-L1 TPS equal to or higher than the median value of total 49 cases (PD-L1 TPS = 30%) were considered as high expression and those with PD-L1 TPS less than the median value as low expression.

(G and H) The OS of cancer patient samples processed without (G) or with (H) deglycosylation by PNGase F (5%) pretreatment. Cases with PD-L1 TPS equal to or higher than the median value of individual group [PD-L1 TPS = 15% in the group of without glycosylation (G) and PD-L1 TPS = 40% in the group of with glycosylation (H), respectively] were considered as high expression and those with PD-L1 TPS less than the respective median value as low expression.

(A–H) Cohort size for each group is indicated. p values were determined by Log-rank (Mantel-Cox) test. Hazard Ratio (HR) and 95% confidence interval (CI) were determined by Mantel-Haenszel method.
